# Supplementary material for: Epidemic history and baseline resistance to NS5A-specific direct acting drugs of hepatitis C virus in Spain
Source: PubMed Central journal article supplement (PMC7398927; doi:10.1038/s41598-020-69692-7), 2020-08-03
Supplement: 41598_2020_69692_MOESM1_ESM.pdf [file 41598_2020_69692_MOESM1_ESM.pdf]

**Type of manuscript:** Original

**Title:** Epidemic history and baseline resistance to NS5A-specific direct acting drugs of Hepatitis C Virus in Spain

**Running head:** HCV GT1a diversity and drug resistance in Spain

**Authors:** Claudia Palladino<sup>1\*¶</sup>, Ifeanyi Jude Ezeonwumelu<sup>1¶</sup>, Irene Mate-Cano<sup>2</sup>, Pedro Borrego<sup>1</sup>, Paula Martínez-Román<sup>2</sup>, Sonia Arca de Lafuente<sup>2</sup>, Salvador Resino<sup>2</sup>, Nuno Taveira<sup>1,3</sup>, Verónica Briz<sup>2</sup>.

## Supplementary Information

### SI1. Appendix

Contributing members of the Spanish Group of Chronic Viral Hepatitis that have participated in this epidemiological survey:

1. Área Sanitaria De Ferrol, Ordoñez Barrosa P.;
2. Centro Médico De Asturias, Vilches Vilches R.;
3. Complejo Asistencial Universitario De Burgos, Saez-Royuela Gonzalo F.;
4. Complejo Hospitalario De Navarra, Polo Vigas I.;
5. Complejo Hospitalario De Orense, Esteban Meruendano G.;
6. Complejo Hospitalario De Pontevedra, Trigo Daporta M.;
7. Complejo Hospitalario Universitario De Santiago, Aguilera Guirao A.;
8. Complejo Hospitalario Universitario La Coruña, Cañizares Castellanos M.A.;
9. Complejo Hospitalario Xeral-Calde, Coira Nieto A.;
10. Fundación Hospital Alcorcón, Casas Losada M.L.;
11. Fundación Hospital De Jove, Hidalgo Pérez E.;
12. Fundación Jiménez Díaz-Ute, Fernández Roblas R.;
13. Gerencia D Area De Salud De Badajoz, Llerena Y Zafra, Sanchez Alor G.;
14. Gestión Sanitaria De Mallorca (Gesma), Fernandez Baca Gutierrez Del Álamo V.;
15. Hospital Arnau De Vilanova De Valencia, Giner Duran R.;
16. Hospital Can Misses, Hurtado Fernandez A.;
17. Hospital Central De Asturias, Melon Garcia S.;
18. Hospital Central De La Defensa Gomez Ulla, Mateo Maestre M.;
19. Hospital Clinic I Provincial De Barcelona, Marco Reverte F.;

20. Hospital Clinico San Carlos, Culebras Lopez E.;
21. Hospital Clinico Univers De Salamanca, Gutierrez Zufiaurre M.N.;
22. Hospital Clinico Univers. De Valladolid, Hinojosa Mena Bernal C.;
23. Hospital Clinico Univers. Lozano Blesa, Rubio Calvo C.;
24. Hospital Comarcal De Inca, Saurina Gomila J.;
25. Hospital De Basurto, Hernaez Crespo S.;
26. Hospital De Cabueñes, Otero Guerra L.;
27. Hospital De Cruces, López Soria L.;
28. Hospital De Donostia, Cilla Eguiluz C.G.;
29. Hospital De Especialidades De Jerez De La Frontera, López Prieto M.D.;
30. Hospital De Especialidades De Puerto Real, Jesús De La Calle I.;
31. Hospital De Gran Canaria Dr. Negrín, Pena López M.J.;
32. Hospital De Hellin, Romero Portilla C.;
33. Hospital De La Agencia Valenciana De Salud Vega Baja, Gonzalo Jiménez N.;
34. Hospital De La Línea De La Concepción, Casas Ciria F.J.;
35. Hospital De Móstoles, López Fabal F.;
36. Hospital De Palamós, Guinart Sola N.;
37. Hospital De Poniente, Cabezas Fernandez T.;
38. Hospital Do Meixoeiro, Pérez Castro S.;
39. Hospital Don Benito-Villanueva De La Serena, Valle Valencia A.;
40. Hospital El Bierzo, Raya Fernández C.;
41. Hospital Ernest Lluch Martin, Fortuño Cebamanos B.;
42. Hospital Galdakao-Usansolo, Lopez De Goicoechea San Román M.J.;
43. Hospital Garcia Orcoyen, Barrado Blanco L.;
44. Hospital General De Castellón, Gomila Sard B.;

45. Hospital General De Lanzarote, Copado Carretero R.;
46. Hospital General De Segovia, Elizaga Corrales J.;
47. Hospital General Juan Ramón Jimenez, Saavedra Martín J.;
48. Hospital General Rio Carrión, García Valero T.;
49. Hospital General San Jorge, Torres Sopena L.;
50. Hospital General Universitario De Alicante, Gimeno Gascón A.;
51. Hospital General Universitario De Elche, Ruiz Garcia M.;
52. Hospital General Universitario Gregorio Marañón, Vicente Rangel T.;
53. Hospital General Universitario Reina Sofía, Marín Cervantes A.J.;
54. Hospital Infanta Cristina (Badajoz), Sánchez Silos R.;
55. Hospital Infanta Elena, De La Iglesia Salgado M.;
56. Hospital J.M. Morales Meseguer, Guerrero Gomez C.;
57. Hospital Mateu Orfila, Carbo L.;
58. Hospital Nuestra Señora De Sonsoles, Gomez Del Campo Dechado A.;
59. Hospital Povisa S.A, Martinez Otero M.D.;
60. Hospital Puerta De Hierro (Majadahonda), Portero Azorin F.;
61. Hospital Rafael Mendez, Cascales Alcolea E.;
62. Hospital Reina Sofia (Cordoba), Rodríguez Cantalejo F.;
63. Hospital Reina Sofia (Tudela), García Irure J.J.;
64. Hospital San Agustina (Asturias), Sierra Dorado G.;
65. Hospital San Pedro, Martinez Gil C.;
66. Hospital Santa Maria Nai, Garcia Costa J.;
67. Hospital Txagorritxu, Lezaun Bugui M.J.;
68. Hospital Univers Marques De Valdecilla, Crespo García J.;
69. Hospital Universitario De Canarias, Díaz-Flores Estevez F.;

70. Hospital Universitario De Ceuta, López Barba J.;
71. Hospital Universitario De La Princesa, Cardeñoso Domingo L.;
72. Hospital Universitario Dr. Peset, Alberola Enguidanos J.;
73. Hospital Universitario Insular De Gran Canaria, Santana Rodriguez E.;
74. Hospital Universitario Miguel Servet, Martínez Sapiña A.;
75. Hospital V. Alvarez Buylla, Galarraga Gay M.C.;
76. Hospital Virgen De La Concha, Martinez Gonzalez R.;
77. Hospital Virgen De La Salud (Toledo), Zamarrón Fuertes P.;
78. Hospital Virgen De La Victoria, Clavijo Frutos E.;
79. Hospital Virgen Del Castillo, López Yepes M.L.;
80. Hospital Virgen Del Puerto, García Tejero C.;
81. Hospital Virgen Del Rocío, Merino Díaz L.;
82. Laboratorio De Referencia Del Camp De Tarragona I Terres De L'Ebre, Puerta  
Martinez M.J.;
83. Laboratorio Referencia Catalunya (El Prat De Llobregat), Salvado Costa M.;
- Soria Guerrero G.;
84. Laboratorio Brsalud, Aznar Cano E.

**Figure SI2. Relative frequency of clade I and II in Spanish hepatitis C virus subtype 1a sequences.** A) Relative frequency of clade I and II among the study population; B) Relative frequency of clade I and II among the HIV/HCV-infected and HCV-monoinfected patients.

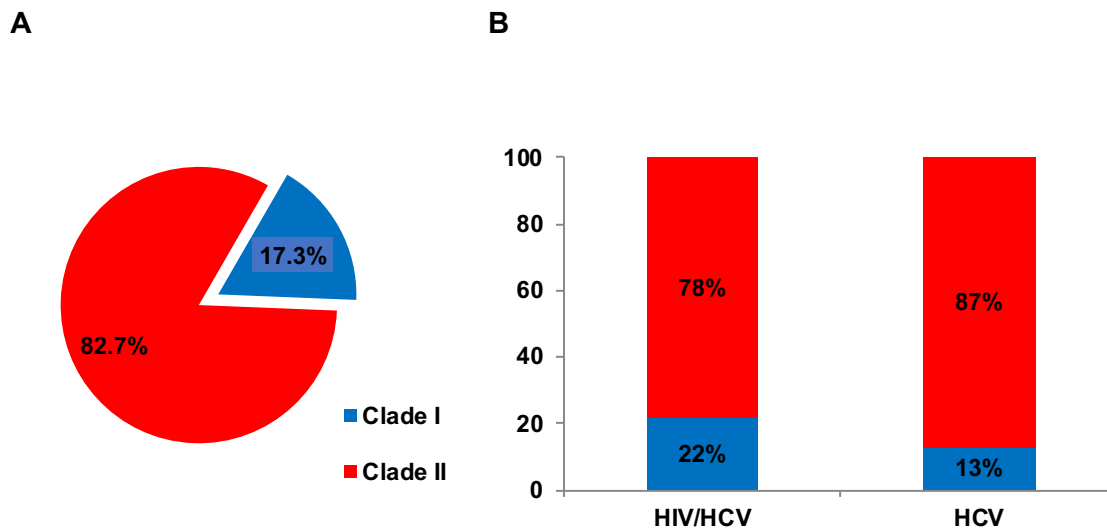

Notes: A) HCV-GT1a clade II was more prevalent than clade I (82.7%, n = 486, vs. 17.3%, n = 102; P<0.0001); B) clade II was more represented in HCV-monoinfected than in HIV/HCV-coinfected patients (87.0%, n = 261, vs. 78.1%, n = 225; P = 0.004).

**Table SI3. Sequences used for the phylogenetic analysis.**

| <b>Reference HCV-GT1a,<br/>accession numbers</b>                 | <b>Sampling date</b> | <b>Country of<br/>origin/sampling</b> |
|------------------------------------------------------------------|----------------------|---------------------------------------|
| AF511950                                                         | Not available        | Not available                         |
| EF407419                                                         | Not available        | USA                                   |
| EF407457                                                         | Not available        | USA                                   |
| HQ850279                                                         | Not available        | USA                                   |
| Other sequences retrieved<br>from the Los Alamos HCV<br>database |                      |                                       |
| GT1i: KC248197                                                   | Not available        | Cameroon                              |
| KC248196                                                         | Not available        | UK                                    |
| KC248193                                                         | Not available        | Not available                         |
| GT1h: KC248199                                                   | Not available        | Cameroon                              |
| KC248198                                                         | Not available        | Cameroon                              |
| GT1g: AM910652                                                   | Not available        | Spain                                 |
| GT1e: KC248194                                                   | Not available        | UK                                    |
| GT1c: AY051292                                                   | Not available        | India                                 |
| GT1b: EU781828                                                   | Not available        | Not available                         |
| EU781827                                                         | Not available        | Not available                         |
| EF032892                                                         | 2003                 | Brazil                                |
| AY587016                                                         | Not available        | China                                 |

Notes: Reference HCV Genotype 1a with accession numbers: AF511950, EF407419, EF407457, HQ850279 were also retrieved from the Los Alamos HCV database and in

addition to the following reference sequences: GT1l: KC248197, KC248196, KC248193;  
GT1h: KC248199, KC248198; GT1g: AM910652; GT1e: KC248194; GT1c: AY051292;  
GT1b: EU781828, EU781827, EF032892, AY587016.



**Table SI4: Bayes Factor estimation for Model comparisons using the Stepping-stone marginal likelihood estimator.** Bayes Factor is given by the ratio of the marginal likelihood estimates (difference between log likelihood of the marginal likelihood estimates):  $b - a$ , and  $d - c$ .

| Molecular Clock<br>model | Bayes factor | BSSVS Substitution<br>Model | Bayes factor |
|--------------------------|--------------|-----------------------------|--------------|
| <b>Clade I</b>           |              |                             |              |
| a. Strict                | 39.30        | Symmetric                   | NA           |
|                          |              | Asymmetric                  |              |
| b. UCLD                  |              | c. Symmetric                | 8.68         |
|                          |              | d. Asymmetric               |              |
| <b>Clade II</b>          |              |                             |              |
| a. Strict                | 526.46       | Symmetric                   | NA           |
|                          |              | Asymmetric                  |              |
| b. UCLD                  |              | c. Symmetric                | 5.21         |
|                          |              | d. Asymmetric               |              |

Notes: NA, the relaxed uncorrelated lognormal clock (UCLD) was selected over the Strict clock and was the only model applied to the Bayesian Stochastic Search Variable Selection (BSSVS) substitution models<sup>32</sup>.

**Table SI5. Studies used to assess the level of resistance of each RAS to each approved NS5A inhibitor (fold-change).**

|             |                                                                                                                                                                                                                                                                                                                                                                                                                                                                                                                                                                                                                                                                                                                                                                                                                                                                                                                                                                                                                                                                                                                                                                                                                                                                                                                                                                                                                                                                                                                                                                                                                                                                                                                                                                                                                       |
|-------------|-----------------------------------------------------------------------------------------------------------------------------------------------------------------------------------------------------------------------------------------------------------------------------------------------------------------------------------------------------------------------------------------------------------------------------------------------------------------------------------------------------------------------------------------------------------------------------------------------------------------------------------------------------------------------------------------------------------------------------------------------------------------------------------------------------------------------------------------------------------------------------------------------------------------------------------------------------------------------------------------------------------------------------------------------------------------------------------------------------------------------------------------------------------------------------------------------------------------------------------------------------------------------------------------------------------------------------------------------------------------------------------------------------------------------------------------------------------------------------------------------------------------------------------------------------------------------------------------------------------------------------------------------------------------------------------------------------------------------------------------------------------------------------------------------------------------------|
| Daclatasvir | <ol style="list-style-type: none"> <li>1. Fridell RA, Wang C, Sun JH, O'Boyle DR, Nower P, Valera L, et al. Genotypic and phenotypic analysis of variants resistant to hepatitis C virus nonstructural protein 5A replication complex inhibitor BMS-790052 in Humans: In Vitro and In Vivo Correlations. <i>Hepatology</i>. 2011;54:1924–1935.</li> <li>2. Fridell RA, Qiu D, Wang C, Valera L, Gao M. Resistance analysis of the hepatitis C virus NS5A inhibitor BMS-790052 in an in vitro replicon system. <i>Antimicrob. Agents Chemother</i>. 2010;54:3641–3650.</li> <li>3. Wang C, Jia L, O'Boyle DR, Sun JH, Rigat K, Valera L, et al. Comparison of daclatasvir resistance barriers on NS5A from hepatitis C virus genotypes 1 to 6: Implications for cross-genotype activity. <i>Antimicrob. Agents Chemother</i>. 2014;58:5155–5163.</li> <li>4. Fridell RA, Qiu D, Valera L, Wang C, Rose RE, Gao M. Distinct Functions of NS5A in Hepatitis C Virus RNA Replication Uncovered by Studies with the NS5A Inhibitor BMS-790052. <i>J. Virol</i>. 2011;85:7312–7320.</li> <li>5. Wang C, Huang H, Valera L, Sun JH, O'Boyle DR, Nower PT, et al. Hepatitis C virus RNA elimination and development of resistance in replicon cells treated with BMS-790052. <i>Antimicrob. Agents Chemother</i>. 2012;56:1350–1358.</li> <li>6. Bilello JP, Lallo LB, McCarville JF, La Colla M, Serra I, Chapron C, et al. In vitro activity and resistance profile of samatasvir, a novel NS5A replication inhibitor of hepatitis C virus. <i>Antimicrob. Agents Chemother</i>. 2014;58:4431–4442.</li> <li>7. Gao M, Nettles RE, Belema M, Snyder LB, Nguyen VN, Fridell RA, et al. Chemical genetics strategy identifies an HCV NS5A inhibitor with a potent clinical effect. <i>Nature</i>. 2010;465:96–100.</li> </ol> |
|-------------|-----------------------------------------------------------------------------------------------------------------------------------------------------------------------------------------------------------------------------------------------------------------------------------------------------------------------------------------------------------------------------------------------------------------------------------------------------------------------------------------------------------------------------------------------------------------------------------------------------------------------------------------------------------------------------------------------------------------------------------------------------------------------------------------------------------------------------------------------------------------------------------------------------------------------------------------------------------------------------------------------------------------------------------------------------------------------------------------------------------------------------------------------------------------------------------------------------------------------------------------------------------------------------------------------------------------------------------------------------------------------------------------------------------------------------------------------------------------------------------------------------------------------------------------------------------------------------------------------------------------------------------------------------------------------------------------------------------------------------------------------------------------------------------------------------------------------|

|            |                                                                                                                                                                                                                                                                                                                                                                                                                                                                                                                                                                                                                                                                                                                                                                                                                                                                                                                                                                                                                                                                                                                                                                                                                                                                                                       |
|------------|-------------------------------------------------------------------------------------------------------------------------------------------------------------------------------------------------------------------------------------------------------------------------------------------------------------------------------------------------------------------------------------------------------------------------------------------------------------------------------------------------------------------------------------------------------------------------------------------------------------------------------------------------------------------------------------------------------------------------------------------------------------------------------------------------------------------------------------------------------------------------------------------------------------------------------------------------------------------------------------------------------------------------------------------------------------------------------------------------------------------------------------------------------------------------------------------------------------------------------------------------------------------------------------------------------|
| Ledipasvir | <p>8. Zeuzem S, Mizokami M, Pianko S, Mangia A, Han KH, Martin R, et al. NS5A resistance-associated substitutions in patients with genotype 1 hepatitis C virus: Prevalence and effect on treatment outcome. <i>J. Hepatol.</i> [Internet]. 2017;66:910–918. Available from: <a href="http://dx.doi.org/10.1016/j.jhep.2017.01.007">http://dx.doi.org/10.1016/j.jhep.2017.01.007</a></p> <p>9. Sarrazin C, Gane EJ, City F, Israel B, Medical D, Hospital AC, et al. Baseline and Post-Baseline Resistance Analyses of Phase 2 / 3 Studies of Ledipasvir / Sofosbuvir ± RBV. 65th Annual Meeting of the American Association for the Study of Liver Diseases Boston, MA Nov 7-11 2014. 2014;</p> <p>10. Wong KA, Worth A, Martin R, Svarovskaia E, Brainard DM, Lawitz E, et al. Characterization of Hepatitis C Virus Resistance from a Multiple-Dose Clinical Trial of the Novel NS5A Inhibitor GS-5885. 2013;57:6333–6340.</p> <p>11. Lawitz EJ, Gruener D, Hill JM, Marbury T, Moorehead L, Mathias A, et al. A phase 1, randomized, placebo-controlled, 3-day, dose-ranging study of GS-5885, an NS5A inhibitor, in patients with genotype 1 hepatitis C. <i>J. Hepatol.</i> 2012;57:24–31.</p> <p>12. European Medicines Agency (EMA). Harvoni - Summary of product characteristics. :1–49.</p> |
| Ombitasvir | <p>13. Krishnan P, Beyer J, Mistry N, Koev G, Reisch T, DeGoey D, et al. In vitro and in vivo antiviral activity and resistance profile of ombitasvir, an inhibitor of hepatitis C virus NS5A. <i>Antimicrob. Agents Chemother.</i> 2015;</p> <p>14. DeGoey DA, Randolph JT, Liu D, Pratt J, Hutchins C, Donner P, et al. Discovery of ABT-267, a pan-genotypic inhibitor of HCV NS5A. <i>J. Med. Chem.</i> 2014;57:2047–2057.</p> <p>15. Wyles DL, Luetkemeyer AF. Understanding Hepatitis C Virus Drug Resistance : Clinical Implications for Current and Future Regimens. <i>Top. Antivir. Med.</i> 2017;25.</p> <p>16. Krishnan P, Tripathi R, Schnell G, Reisch T, Beyer J, Irvin M, et al. Pooled</p>                                                                                                                                                                                                                                                                                                                                                                                                                                                                                                                                                                                           |

|             |                                                                                                                                                                                                                                                                                                                                                                                                                                                                                                                                                                                                                                                                                                                                                                                                                                                                                                                                                                                                                                                                                                                                                                                                                                                                                                                      |
|-------------|----------------------------------------------------------------------------------------------------------------------------------------------------------------------------------------------------------------------------------------------------------------------------------------------------------------------------------------------------------------------------------------------------------------------------------------------------------------------------------------------------------------------------------------------------------------------------------------------------------------------------------------------------------------------------------------------------------------------------------------------------------------------------------------------------------------------------------------------------------------------------------------------------------------------------------------------------------------------------------------------------------------------------------------------------------------------------------------------------------------------------------------------------------------------------------------------------------------------------------------------------------------------------------------------------------------------|
|             | <p>analysis of resistance in patients treated with ombitasvir/ABT-450/r and dasabuvir with or without ribavirin in Phase 2 and Phase 3 clinical trials. <i>Hepatology</i>. 2014;60:1134–1135.</p> <p>17. Krishnan P, Tripathi R, Schnell G, Reisch T, Beyer J, Irvin M, et al. Resistance analysis of baseline and treatment-emergent variants in hepatitis C virus genotype 1 in the AVIATOR study with paritaprevir-ritonavir, ombitasvir, and dasabuvir. <i>Antimicrob. Agents Chemother</i>. 2015;59:5445–5454.</p> <p>18. AbbVie. Highlights of Prescribing Information for Viekira Pak [Internet]. 2017. Available from: <a href="https://www.rxabbvie.com/pdf/viekirapak_pi.pdf">https://www.rxabbvie.com/pdf/viekirapak_pi.pdf</a></p>                                                                                                                                                                                                                                                                                                                                                                                                                                                                                                                                                                       |
| Elbasvir    | <p>19. Black S, Pak I, Ingravallo P, McMonagle P, Chase R, Shaughnessy M, et al. Resistance Analysis of Virologic Failures in Hepatitis C Genotype 1-Infected Patients Treated With Grazoprevir + Elbasvir ± Ribavirin: the C-WORTHY Study [Internet]. Vienna, Austria: 2015. Available from: <a href="http://www.natap.org/2015/EASL/EASL_107.htm">http://www.natap.org/2015/EASL/EASL_107.htm</a></p> <p>20. Lahser FC, Bystol K, Curry S, McMonagle P, Xia E, Ingravallo P, et al. The combination of grazoprevir, a hepatitis C virus (HCV) NS3/4A protease inhibitor, and elbasvir, an HCV NS5A inhibitor, demonstrates a high genetic barrier to resistance in HCV genotype 1a replicons. <i>Antimicrob. Agents Chemother</i>. 2016;60:2954–2964.</p> <p>21. Liu R, Curry S, McMonagle P, Yeh WW, Ludmerer SW, Jumes PA, et al. Susceptibilities of genotype 1a, 1b, and 3 hepatitis C virus variants to the NS5A inhibitor elbasvir. <i>Antimicrob. Agents Chemother</i>. 2015;59:6922–6929.</p> <p>22. Merck Sharp &amp; Dohme Corp. ZEPATIER (elbasvir and grazoprevir) PRESCRIBING INFORMATION [Internet]. 2017; Available from: <a href="https://www.accessdata.fda.gov/drugsatfda_docs/label/2017/208261s002lbl.pdf">https://www.accessdata.fda.gov/drugsatfda_docs/label/2017/208261s002lbl.pdf</a></p> |
| Velpatasvir | <p>23. Lawitz EJ, Dvory-Sobol H, Doehle BP, Worth AS, McNally J, Brainard DM, et al. Clinical resistance to velpatasvir (GS-5816), a novel pan-genotypic inhibitor</p>                                                                                                                                                                                                                                                                                                                                                                                                                                                                                                                                                                                                                                                                                                                                                                                                                                                                                                                                                                                                                                                                                                                                               |

|              |                                                                                                                                                                                                                                                                                                                                                                                                                                                                                                                                                                                                                                                                                                                                                       |
|--------------|-------------------------------------------------------------------------------------------------------------------------------------------------------------------------------------------------------------------------------------------------------------------------------------------------------------------------------------------------------------------------------------------------------------------------------------------------------------------------------------------------------------------------------------------------------------------------------------------------------------------------------------------------------------------------------------------------------------------------------------------------------|
|              | <p>of the hepatitis C virus NS5A protein. <i>Antimicrob. Agents Chemother.</i> 2016;</p> <p>24. Feld JJ, Jacobson IM, Asselah T, Ruane PJ, Gruener N, Abergel A, et al. Sofosbuvir and Velpatasvir for HCV Genotype 1, 2, 4, 5, and 6 Infection. <i>N. Engl. J. Med.</i> 2015;373:2599–2607.</p> <p>25. Curry MP, O’Leary JG, Bzowej N, Muir AJ, Korenblat KM, Fenkel JM, et al. Sofosbuvir and Velpatasvir for HCV in Patients with Decompensated Cirrhosis. <i>N. Engl. J. Med.</i> [Internet]. 2015;151116123036000. Available from: <a href="http://www.nejm.org/doi/abs/10.1056/NEJMoa1512614">http://www.nejm.org/doi/abs/10.1056/NEJMoa1512614</a></p>                                                                                         |
| Pibrentasvir | <p>26. AbbVie. MAVYRET (glecaprevir and pibrentasvir) Highlights of prescribing information. 2018;1–34. Available from: <a href="https://www.rxabbvie.com/pdf/mavyret_pi.pdf">https://www.rxabbvie.com/pdf/mavyret_pi.pdf</a></p> <p>27. Ng TI, Krishnan P, Pilot-matias T, Kati W, Schnell G, Beyer J, et al. In Vitro Antiviral Activity and Resistance Profile of the Next-Generation Hepatitis C Virus NS5A Inhibitor Pibrentasvir. 2017;61:1–14.</p> <p>28. Krishnan P, Schnell G, Tripathi R, Beyer J, Reisch T, Dekhtyar T, et al. Integrated resistance analysis of CERTAIN-1 and CERTAIN-2 studies in hepatitis C virus-infected patients receiving glecaprevir and pibrentasvir in Japan. <i>Antimicrob. Agents Chemother.</i> 2018;62.</p> |

**Table SI6. Sequences with inconsistent clade classification based on the phylogenetic analysis and the geno2pheno<sub>[HCV]</sub>**

| Sequences ID | Clade by<br>phylogenetic analysis | Clade by<br>geno2pheno <sub>[HCV]</sub> |
|--------------|-----------------------------------|-----------------------------------------|
| SRT_792      | 2                                 | 1                                       |
| SRT_698      | 2                                 | 1                                       |
| SRT_812      | 2                                 | 1                                       |
| SRT_904      | 1                                 | 2                                       |
